# Supplementary material for: From chloro to fluoro, expanding the role of aluminum phthalocyanine in organic photovoltaic devices
Source: Royal Society of Chemistry journal article supplement (doi:10.1039/c4ta06759b), 2015-01-01
Supplement: c4ta06759b1.pdf [file c4ta06759b1.pdf]

# **From Chloro to Fluoro, Expanding the Role of Aluminium Phthalocyanine in Organic Photovoltaic Devices.**

Benoît H. Lessard<sup>1</sup>, Mohammad Al-Amar<sup>1</sup>, Trevor M. Grant<sup>1</sup>, Robin White<sup>2</sup>, Zheng-Hong Lu<sup>2</sup> and Timothy P. Bender<sup>1,2,3,\*</sup>

<sup>1</sup> University of Toronto, Dept. of Chemical Engineering & Applied Chemistry.  
200 College Street, Toronto, Ontario M5S 3E5.

<sup>2</sup> University of Toronto, Dept. of Materials Science and Engineering.  
200 College Street, Toronto, Ontario M5S 3E5.

<sup>3</sup> University of Toronto, Dept. of Chemistry.  
80 St. George Street, Toronto, Ontario M5S 3H6.

Electronic Supporting Information.

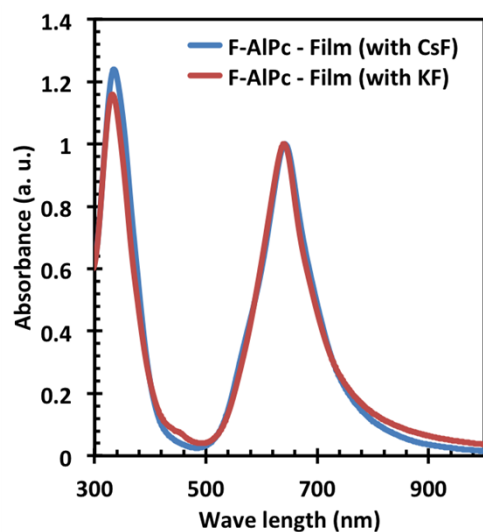

**Figure S1.** Normalized absorbance spectra of films of F-AlPc synthesized using CsF or KF.

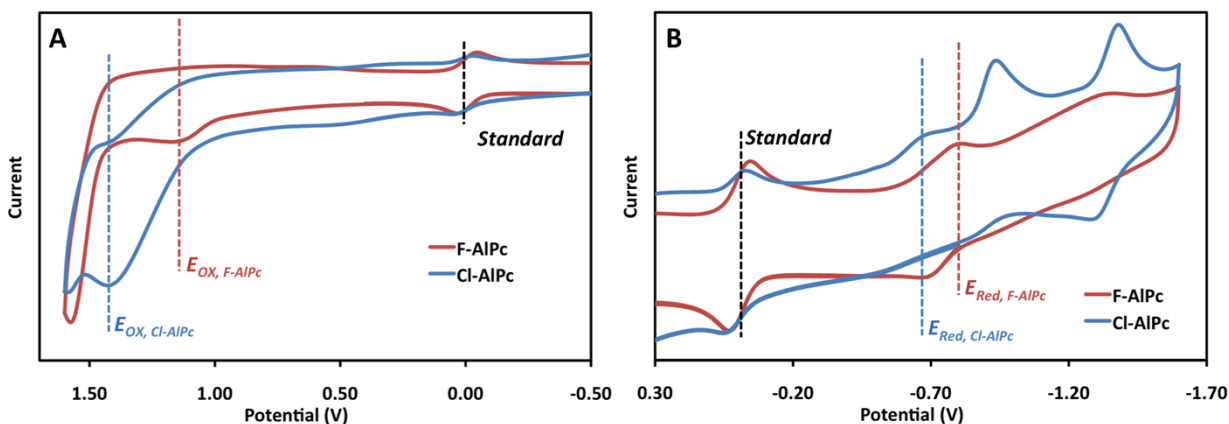

**Figure S2.** Characteristic electrochemical spectra for the A) oxidative scanning and B) reductive scanning of Cl-AlPc & F-AlPc. Electrochemistry was performed at 100mV/s scan rate (3 cycles) using a reference electrode of Ag/AgCl and internal standard of decamethyl ferrocene.

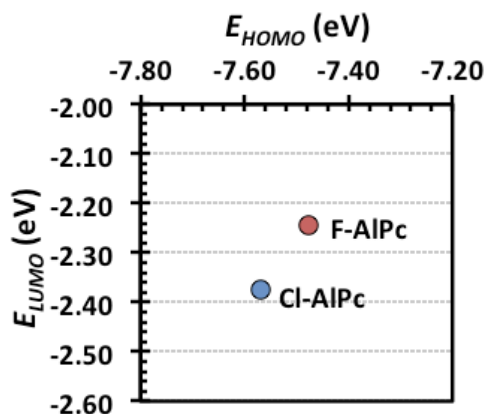

**Figure S3.** Highest occupied molecular orbital ( $E_{HOMO}$ ) and lowest unoccupied molecular orbital ( $E_{LUMO}$ ) estimated using preliminary modeling with semi-empirical level using the PM3 parameter for both F-AlPc and Cl-AlPc.

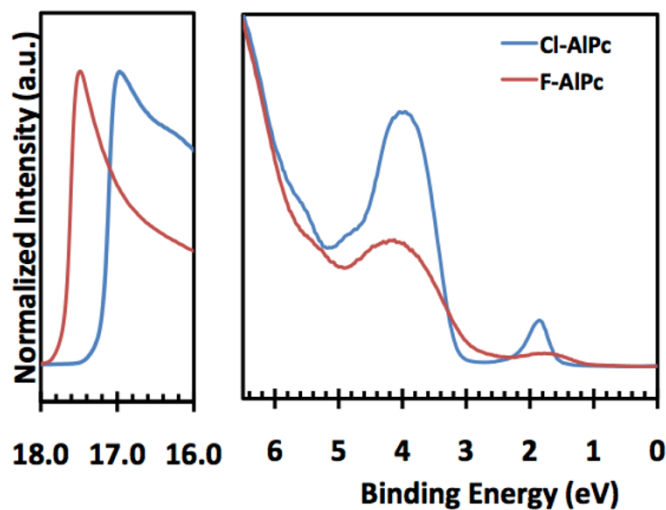

**Figure S4 -** Ultraviolet photoelectron spectroscopy (UPS) spectra of both the Cl-AlPc (blue line) and the F-AlPc (red line). The energy levels are aligned to its vacuum level work function, of highly ordered pyrolytic graphite, at 4.45 eV.

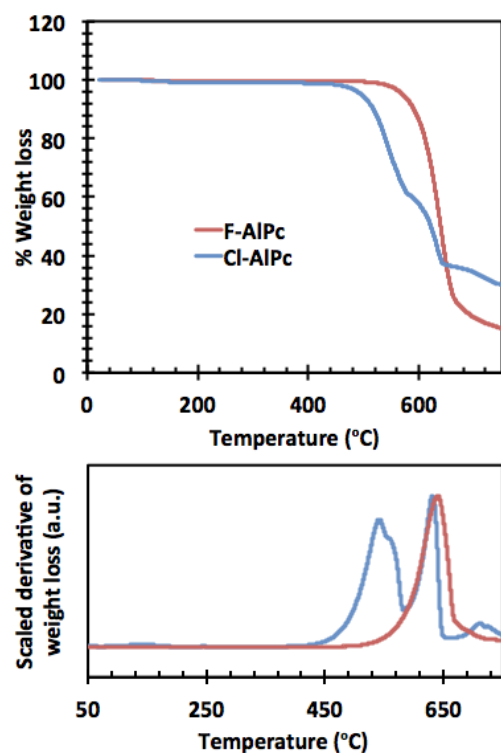

**Figure S5.** Characteristic thermo gravimetric analysis (TGA) spectra, where top figure is the %mass loss relative to temperature (°C) and the bottom figure corresponds to the scaled derivative of the mass loss relative to temperature (°C) for the Cl-AlPc and F-AlPc.

**Table S1.** UV-Vis absorbances spectroscopy results for chloro and fluoro aluminum phthalocyanine .

| Sample  | DMSO                           |                          | Chloroform                     |                          | Toluene                        |                          | Films                          |                          |
|---------|--------------------------------|--------------------------|--------------------------------|--------------------------|--------------------------------|--------------------------|--------------------------------|--------------------------|
|         | $\lambda_{\text{max}}$<br>(nm) | E <sub>gap</sub><br>(eV) |
| AlPc-Cl | 680                            | 1.78                     | 681                            | 1.77                     | 688                            | 1.77                     | 771                            | 1.48                     |
| AlPc-F  | 671                            | 1.81                     | 688                            | 1.77                     | 690                            | 1.76                     | 647                            | 1.61                     |
